# Supplementary material
Source: MDPI journal article supplement (https://www.mdpi.com/2071-1050/16/1/338)
Supplement: s1 [file s1]

# Enhancing the Fuel Properties of Spent Coffee Grounds through Hydrothermal Carbonization: Output Prediction and Post-Treatment Approaches

Chau Huyen Dang <sup>1,2,\*</sup>, Gianluigi Farru <sup>3,\*</sup>, Claudia Glaser <sup>4</sup>, Marcus G. Fischer <sup>1</sup> and Judy A. Libra <sup>1</sup>

<sup>1</sup> Department of System Process Engineering, Leibniz Institute for Agricultural Engineering and Bioeconomy (ATB), Max-Eyth-Allee 100, 14469 Potsdam, Germany; mfischer@atb-potsdam.de (M.G.F.); jlibra@atb-potsdam.de (J.A.L.)

<sup>2</sup> Institute of Waste Management and Circular Economy, Faculty of Environmental Sciences, Technische Universität Dresden, Pratzschwitzer 15, 01796 Pirna, Germany

<sup>3</sup> Department of Civil and Environmental Engineering and Architecture, University of Cagliari, Via Marengo 2, 09123 Cagliari, Italy

<sup>4</sup> Department of Process and Plant Technology, Brandenburg University of Technology Cottbus-Senftenberg, Burger Chaussee 2, 03046 Cottbus, Germany; claudia.glaser@b-tu.de (C.G.)

\* Correspondence: hdang@atb-potsdam.de (C.H.D.); gianluigi.farru@unica.it (G.F.)

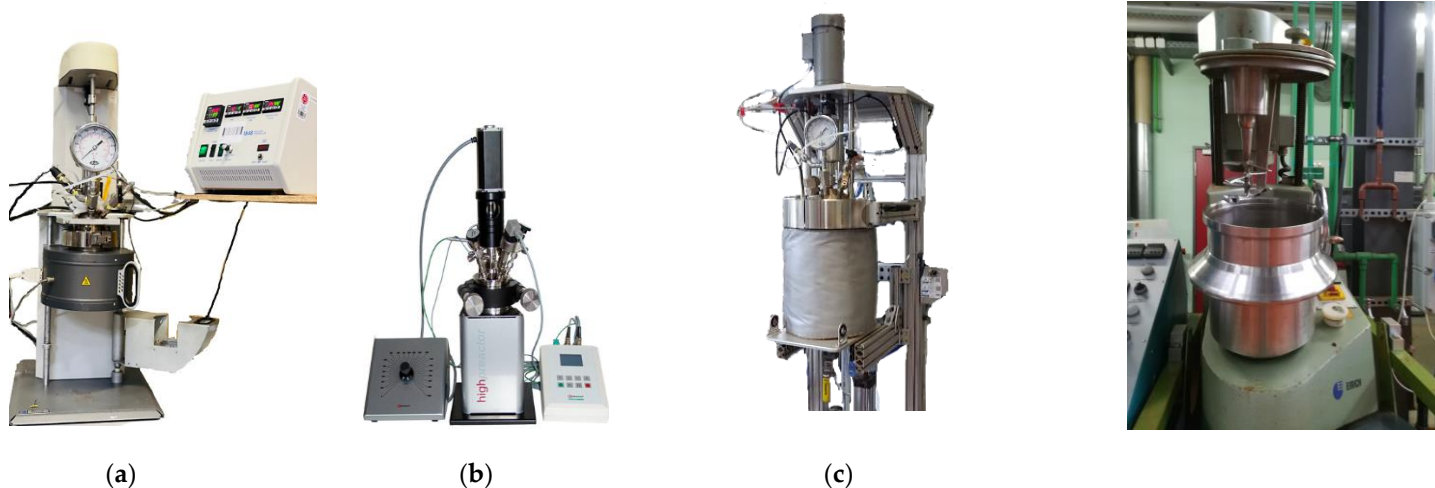

**Figure S1.** Pressurized reactors used for performing HTC experiments:

- (a) 1 L (model 4520, PARR, USA);
- (b) 1.5 L (model BR-1000, Berghof, Germany);
- (c) 18.75 L (model 4555, PARR, USA).

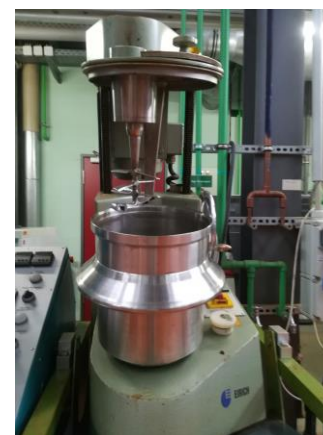

**Figure S2.** The intensive mixer type EL10 (EIRICH Machines, Inc., USA) was used for conducting the agglomeration experiments.

**Table S1.** Predicted and measured results of the outputs (incl. Solid yield - SY [wt%-db], Higher heating value - HHV [MJ/kg] and energy yield - EY [%]) of two groups of HTC set-up runs (DoE set-up and Random set-up).

| HTC Runs                                | SY [wt%-db] |                     |                          | HHV [MJ/kg] |                     |                           |                           | EY [%] |                     |                          |                          |                             |
|-----------------------------------------|-------------|---------------------|--------------------------|-------------|---------------------|---------------------------|---------------------------|--------|---------------------|--------------------------|--------------------------|-----------------------------|
|                                         | meas        | pred <sup>DoE</sup> | pred <sup>GP_SY-OP</sup> | meas        | pred <sup>DoE</sup> | pred <sup>GP_HHV-EA</sup> | pred <sup>GP_HHV-OP</sup> | meas   | pred <sup>DoE</sup> | pred <sup>GP_EY-EA</sup> | pred <sup>GP_EY-OP</sup> | pred <sup>GP_EY-EA+OP</sup> |
| SCG                                     | -           | -                   | -                        | 22.54       | -                   | -                         | -                         | -      | -                   | -                        | -                        | -                           |
| <i>DoE runs</i>                         |             |                     |                          |             |                     |                           |                           |        |                     |                          |                          |                             |
| D_240_1_13%                             | 59.87       | 55.94               | 54.83                    | 31.11       | 31.06               | 32.54                     | 27.16                     | 82.63  | 77.47               | 78.31                    | 66.05                    | 65.36                       |
| D_160_5_6%                              | 71.84       | 71.06               | 66.37                    | 25.22       | 25.70               | 25.01                     | 24.06                     | 80.38  | 80.28               | 72.87                    | 70.83                    | 70.09                       |
| D_240_5_6%                              | 51.74       | 52.26               | 47.16                    | 32.97       | 32.68               | 34.74                     | 27.93                     | 75.66  | 75.64               | 71.92                    | 58.42                    | 57.81                       |
| D_160_1_6%                              | 69.16       | 70.35               | 69.86                    | 24.35       | 24.24               | 24.26                     | 23.55                     | 74.71  | 76.31               | 74.40                    | 72.97                    | 72.21                       |
| D_200_3_13%                             | 66.24       | 65.67               | 63.63                    | 29.11       | 28.31               | 29.78                     | 25.67                     | 85.53  | 81.75               | 83.19                    | 72.45                    | 71.70                       |
| D_160_5_13%                             | 75.80       | 75.40               | 70.51                    | 25.47       | 25.55               | 25.31                     | 24.05                     | 85.63  | 86.03               | 78.34                    | 75.24                    | 74.45                       |
| AAE [%]                                 | -           | 1.96 %              | 6.13 %                   | -           | 1.08 %              | 2.35 %                    | 8.89 %                    | -      | 2.24 %              | 5.20 %                   | 14.08 %                  | 14.98 %                     |
| ABE [%]                                 | -           | -1.05 %             | -5.79 %                  | -           | -0.34 %             | 1.74 %                    | -8.89 %                   | -      | -1.37 %             | -5.20 %                  | -14.08 %                 | -14.98 %                    |
| <i>Random runs</i>                      |             |                     |                          |             |                     |                           |                           |        |                     |                          |                          |                             |
| R_230_3_20%                             | 61.91       | 63.12               | 60.92                    | 30.70       | 30.76               | 35.70                     | 27.07                     | 84.30  | 85.96               | 95.47                    | 73.15                    | 72.39                       |
| R_250_3_20%                             | 58.40       | 58.40               | 55.13                    | 31.88       | 32.51               | 35.75                     | 28.00                     | 82.57  | 84.77               | 86.51                    | 68.49                    | 67.77                       |
| R_220_1_10%                             | 58.79       | 58.77               | 59.24                    | 29.03       | 29.39               | 26.22                     | 26.25                     | 75.71  | 76.15               | 68.17                    | 68.99                    | 68.27                       |
| R_240_1_10%                             | 51.94       | 54.07               | 53.72                    | 31.06       | 31.13               | 27.40                     | 27.16                     | 71.56  | 74.99               | 64.60                    | 64.71                    | 64.04                       |
| R_200_3_20%                             | 70.21       | 70.11               | 67.76                    | 28.13       | 28.15               | 28.73                     | 25.67                     | 87.61  | 87.62               | 85.45                    | 77.15                    | 76.34                       |
| R_220_3_20%                             | 64.89       | 65.43               | 63.57                    | 30.07       | 29.89               | 30.66                     | 26.60                     | 86.55  | 86.48               | 85.56                    | 75.02                    | 74.23                       |
| R_230_3_20%                             | 62.73       | 63.11               | 58.05                    | 31.03       | 30.76               | 31.32                     | 27.07                     | 86.36  | 85.95               | 79.81                    | 69.71                    | 68.98                       |
| AAE [%]                                 | -           | 1.09 %              | 3.48 %                   | -           | 0.74 %              | 7.85 %                    | 11.31 %                   | -      | 1.51 %              | 6.99 %                   | 13.33 %                  | 14.23 %                     |
| ABE [%]                                 | -           | 1.04 %              | -2.28 %                  | -           | 0.32 %              | 1.71 %                    | -11.31 %                  | -      | 1.35 %              | -1.84 %                  | -13.33 %                 | -14.23 %                    |
| <i>Both groups<br/>(DoE and Random)</i> |             |                     |                          |             |                     |                           |                           |        |                     |                          |                          |                             |
| AAE [%]                                 | -           | 1.49 %              | 4.71 %                   | -           | 0.89 %              | 5.32 %                    | 10.19 %                   | -      | 1.85 %              | 6.16 %                   | 13.67 %                  | 14.58 %                     |
| ABE [%]                                 | -           | 0.08 %              | -3.90 %                  | -           | 0.02 %              | 1.73%                     | -10.19 %                  | -      | 0.10 %              | -3.39 %                  | -13.67 %                 | -14.58 %                    |

<sup>1</sup>meas = measured values; pred<sup>DoE</sup> = predicted values from DoE model; pred<sup>GP\_SY-OP</sup> = predicted solid yield from GP model based on HTC operating conditions; pred<sup>GP\_HHV-EA</sup> = predicted HHV from GP model based on the elemental composition of the HC (or FS); pred<sup>GP\_HHV-OP</sup> = predicted HHV from GP model based on measured HHV<sub>0</sub> - FS and HTC-operating conditions; pred<sup>GP\_EY-EA</sup> = predicted energy yield from GP model based on the elemental composition of FS and HC (no measured HHV) and SY-OP; pred<sup>GP\_EY-OP</sup> = predicted energy yield from GP model based on measured HHV<sub>0</sub> - FS value and HTC-operating conditions – using the HHV-OP and SY-OP correlations; pred<sup>GP\_EY-EA+OP</sup> = predicted energy yield from GP model based on based on the HHV-EA for FS, HHV-OP for HC and SY-OP correlations; <sup>2</sup> AAE = average absolute error; ABE = average bias error.

**Table S2.** Comparison of measured values from the literature and this study to predicted values from DoE model .

| HTC Operating Conditions |                 |                 | Measured Values |                |           | Predicted Values from DoE Model of this Study |                |           | References |
|--------------------------|-----------------|-----------------|-----------------|----------------|-----------|-----------------------------------------------|----------------|-----------|------------|
| <i>T</i><br>[°C]         | <i>t</i><br>[h] | %So<br>[wt%-db] | SY<br>[wt%-db]  | HHV<br>[MJ/kg] | EY<br>[%] | SY<br>[wt%-db]                                | HHV<br>[MJ/kg] | EY<br>[%] |            |
| 240                      | 1               | 12.98           | 59.87           | 31.11          | 82.63     | 55.94                                         | 31.06          | 77.47     | This study |
| 160                      | 5               | 6.02            | 71.84           | 25.22          | 80.38     | 71.06                                         | 25.70          | 80.28     | This study |
| 240                      | 5               | 6               | 51.74           | 32.97          | 75.66     | 52.26                                         | 32.68          | 75.64     | This study |
| 160                      | 1               | 6.02            | 69.16           | 24.35          | 74.71     | 70.35                                         | 24.24          | 76.31     | This study |
| 200                      | 3               | 12.96           | 66.24           | 29.11          | 85.53     | 65.67                                         | 28.31          | 81.75     | This study |
| 160                      | 5               | 12.94           | 75.8            | 25.47          | 85.63     | 75.40                                         | 25.55          | 86.03     | This study |
| 230                      | 3               | 20.11           | 61.91           | 30.7           | 84.30     | 63.12                                         | 30.76          | 85.96     | This study |
| 250                      | 3               | 20.07           | 58.4            | 31.88          | 82.57     | 58.40                                         | 32.51          | 84.77     | This study |
| 220                      | 1               | 10              | 58.79           | 29.03          | 75.71     | 58.77                                         | 29.39          | 76.15     | This study |
| 240                      | 1               | 10              | 51.94           | 31.06          | 71.56     | 54.07                                         | 31.13          | 74.99     | This study |
| 200                      | 3               | 20.02           | 70.21           | 28.13          | 87.61     | 70.11                                         | 28.15          | 87.62     | This study |
| 220                      | 3               | 20.04           | 64.89           | 30.07          | 86.55     | 65.43                                         | 29.89          | 86.48     | This study |
| 230                      | 3               | 20.1            | 62.73           | 31.03          | 86.36     | 63.11                                         | 30.76          | 85.95     | This study |
| 170                      | 1               | 30              | 91              | 25             | 101.01    | 83.06                                         | 24.58          | 95.67     | [16]       |
| 200                      | 1               | 30              | 75              | 27             | 88.5      | 76.02                                         | 27.19          | 93.93     | [16]       |
| 220                      | 1               | 30              | 62              | 29             | 78.74     | 71.33                                         | 28.94          | 92.77     | [16]       |
| 250                      | 1               | 30              | 55              | 33             | 80.85     | 64.28                                         | 31.55          | 91.04     | [16]       |
| 150                      | 0.5             | 16.67           | 81.39           | 23.54          | 83.93     | 79.30                                         | 22.95          | 85.24     | [17]       |
| 150                      | 0.5             | 9.09            | 72              | 23.85          | 75.99     | 74.54                                         | 23.12          | 78.95     | [17]       |
| 150                      | 0.5             | 6.25            | 70              | 23.98          | 72.39     | 72.75                                         | 23.18          | 76.59     | [17]       |
| 200                      | 3               | 14.29           | 80              | 26             | 84        | 66.50                                         | 28.28          | 82.85     | [27]       |
| 220                      | 3               | 14.69           | 75              | 28             | 87        | 62.06                                         | 30.01          | 82.04     | [27]       |
| 240                      | 3               | 15.09           | 71              | 32.33          | 93        | 57.62                                         | 31.75          | 81.21     | [27]       |
| 200                      | 1               | 20              | 73.3            | 28.5           | 95.2      | 69.74                                         | 27.42          | 85.62     | [56]       |
| 200                      | 3               | 20              | 73.8            | 28.7           | 96.2      | 70.09                                         | 28.15          | 87.60     | [56]       |
| 230                      | 1               | 20              | 62.8            | 30.1           | 86.1      | 62.70                                         | 30.03          | 83.88     | [56]       |
| 230                      | 3               | 20              | 62.7            | 31.6           | 90.3      | 63.05                                         | 30.76          | 85.87     | [56]       |
| 260                      | 1               | 20              | 57              | 32.4           | 84.2      | 55.66                                         | 32.65          | 82.15     | [56]       |
| 260                      | 3               | 20              | 54.9            | 33.2           | 83        | 56.01                                         | 33.38          | 84.13     | [56]       |

i. SY [wt%-db]

ii. HHV [MJ/kg]

iii. EY [%]

(a)

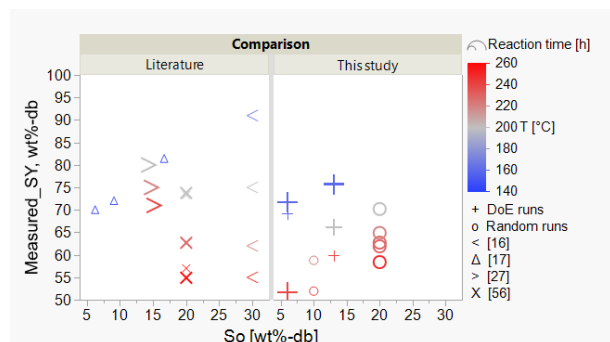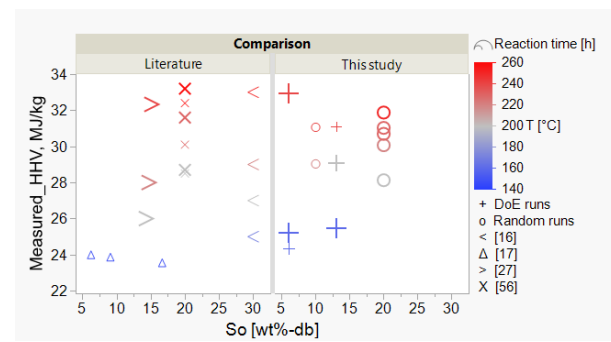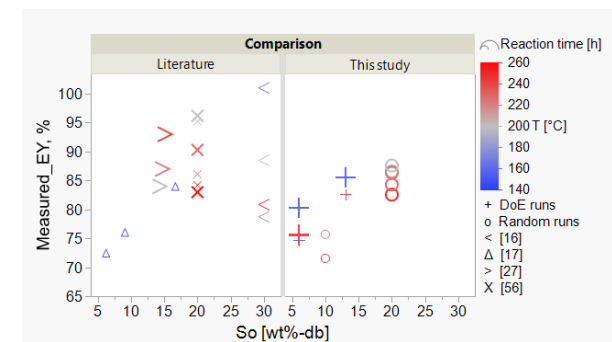

(b)

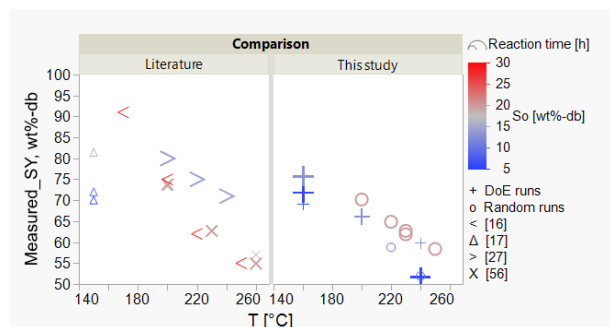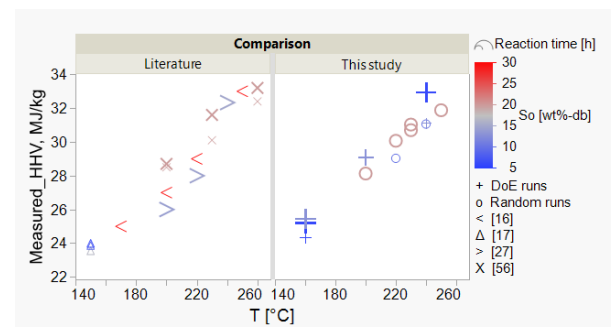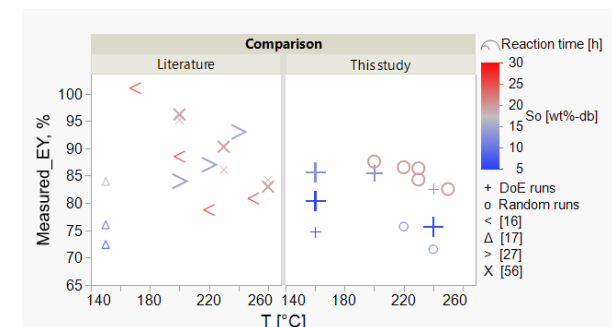

**Figure S3.** (a) Comparison of HTC outputs (i. SY [wt%-db], ii. HHV [MJ/kg], and iii. EY [%]) vs %So between literature and this study  
(b) Comparison of HTC outputs (i. SY [wt%-db], ii. HHV [MJ/kg], and iii. EY [%]) vs  $T$  between literature and this study.

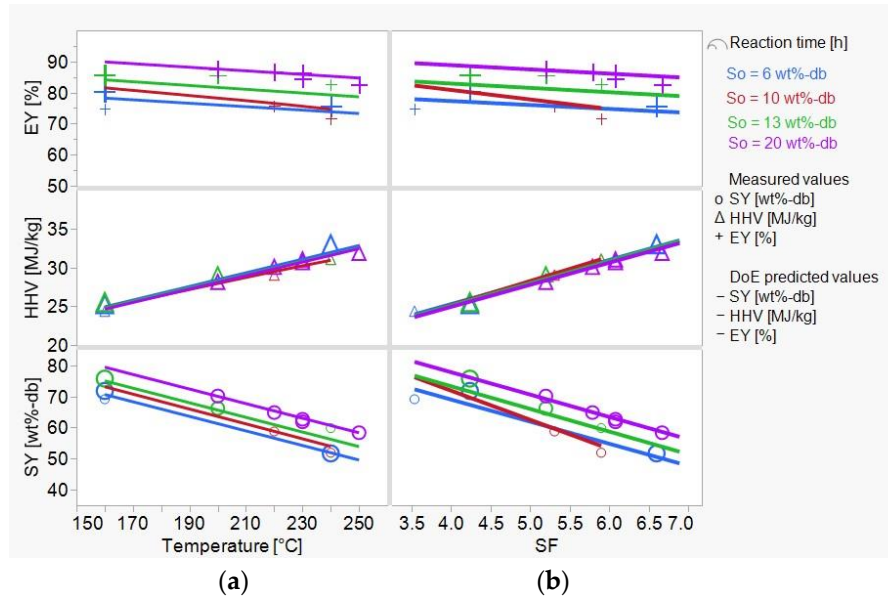

**Figure S4.** Comparison of measured and predicted (DoE model) values for the HTC outputs vs. (a)  $T$  and (b) severity factor (SF) for the three process parameters  $T$ ,  $t$ ,  $\%So$ .

**Table S3.** Elemental analysis and atomic ratios of hydrochars (HC) from both DoE and Random set-up runs.

| SCG and its HC          | C<br>[wt%-db] | H<br>[wt%-db] | N<br>[wt%-db] | S<br>[wt%-db] | O<br>[wt%-db] | H/C<br>[-]   | O/C<br>[-]    |
|-------------------------|---------------|---------------|---------------|---------------|---------------|--------------|---------------|
| SCG                     | 55.65 ± 0.035 | 6.27 ± 0.010  | 2.49 ± 0.007  | 0.17 ± 0.021  | 35.42 ± 0.078 | 1.35 ± 0.002 | 0.40 ± 0.001  |
| <i>From DoE runs</i>    |               |               |               |               |               |              |               |
| HC_160_1_6%             | 57.98 ± 0.184 | 5.70 ± 0.078  | 2.19 ± 0.031  | 0.34 ± 0.019  | 33.78 ± 0.195 | 1.18 ± 0.017 | 0.44 ± 0.001  |
| HC_160_5_6%             | 59.88 ± 0.049 | 5.89 ± 0.174  | 2.16 ± 0.129  | 0.23 ± 0.010  | 31.84 ± 0.168 | 1.19 ± 0.035 | 0.41 ± 0.003  |
| HC_160_5_13%            | 58.54 ± 0.007 | 5.56 ± 0.133  | 2.38 ± 0.259  | 0.29 ± 0.006  | 33.24 ± 0.008 | 1.14 ± 0.027 | 0.43 ± 0.0001 |
| HC_200_3_13%            | 69.09 ± 0.087 | 5.62 ± 0.030  | 2.85 ± 0.020  | 0.26 ± 0.005  | 22.18 ± 0.103 | 0.98 ± 0.005 | 0.24 ± 0.001  |
| HC_240_1_13%            | 73.34 ± 0.166 | 5.55 ± 0.106  | 3.06 ± 0.035  | 0.27 ± 0.007  | 17.78 ± 0.088 | 0.91 ± 0.017 | 0.18 ± 0.001  |
| HC_240_5_6%             | 77.42 ± 0.076 | 6.13 ± 0.005  | 3.10 ± 0.018  | 0.26 ± 0.010  | 13.09 ± 0.082 | 0.95 ± 0.038 | 0.13 ± 0.001  |
| <i>From Random runs</i> |               |               |               |               |               |              |               |
| R_230_3_20%             | 73.60 ± 0.099 | 5.49 ± 0.007  | 3.24 ± 0.034  | 0.24 ± 0.013  | 17.43 ± 0.120 | 0.89 ± 0.002 | 0.18 ± 0.001  |
| R_250_3_20%             | 75.71 ± 0.148 | 5.95 ± 0.141  | 3.32 ± 0.046  | 0.21 ± 0.023  | 14.81 ± 0.006 | 0.94 ± 0.022 | 0.15 ± 0.001  |

|             |               |              |              |              |               |              |               |
|-------------|---------------|--------------|--------------|--------------|---------------|--------------|---------------|
| R_220_1_10% | 63.58 ± 0.014 | 6.97 ± 0.701 | 2.59 ± 0.010 | 0.00 ± 0.00  | 26.86 ± 0.014 | 1.32 ± 0.013 | 0.32 ± 0.0002 |
| R_240_1_10% | 66.11 ± 0.021 | 6.73 ± 0.014 | 2.98 ± 0.035 | 0.00 ± 0.00  | 24.17 ± 0.085 | 1.22 ± 0.003 | 0.27 ± 0.001  |
| R_200_3_20% | 68.95 ± 0.141 | 5.76 ± 0.075 | 3.03 ± 0.007 | 0.20 ± 0.010 | 20.82 ± 0.202 | 1.00 ± 0.013 | 0.27 ± 0.002  |
| R_220_3_20% | 72.42 ± 0.049 | 6.36 ± 0.136 | 3.14 ± 0.054 | 0.21 ± 0.013 | 16.31 ± 0.136 | 1.05 ± 0.023 | 0.22 ± 0.001  |
| R_230_3_20% | 73.76 ± 0.035 | 5.95 ± 0.102 | 3.22 ± 0.015 | 0.22 ± 0.010 | 15.49 ± 0.200 | 0.97 ± 0.017 | 0.19 ± 0.002  |

**Table S4.** The emission factor of trace elements of SCG and its HC from 6 DoE set-up runs and 5 Random set-up runs.

| SCG and its HC          | Cd<br>[mg/MJ]                  | Cr<br>[mg/MJ]                  | Cu<br>[mg/MJ]                  | Ni<br>[mg/MJ]                  | Pb<br>[mg/MJ]                  | Zn<br>[mg/MJ]                  |
|-------------------------|--------------------------------|--------------------------------|--------------------------------|--------------------------------|--------------------------------|--------------------------------|
| SCG                     | 0.0009 ± 8.97*10 <sup>-5</sup> | n.d.                           | 1.0051 ± 5.45*10 <sup>-3</sup> | 0.0758 ± 8.32*10 <sup>-4</sup> | 0.0199 ± 3.27*10 <sup>-3</sup> | 0.9709 ± 3.02*10 <sup>-2</sup> |
| <i>From DoE runs</i>    |                                |                                |                                |                                |                                |                                |
| HC_160_1_6%             | n.d.                           | 0.0089 ± 6.75*10 <sup>-3</sup> | 0.3224 ± 1.02*10 <sup>-3</sup> | 0.0205 ± 2.46*10 <sup>-2</sup> | n.d.                           | 0.1826 ± 1.59*10 <sup>-3</sup> |
| HC_160_5_6%             | n.d.                           | n.d.                           | 0.2857 ± 2.52*10 <sup>-3</sup> | 0.0039 ± 2.54*10 <sup>-4</sup> | n.d.                           | 0.1315 ± 1.48*10 <sup>-3</sup> |
| HC_160_5_13%            | n.d.                           | n.d.                           | 0.1361 ± 1.92*10 <sup>-1</sup> | 0.0028 ± 3.95*10 <sup>-3</sup> | n.d.                           | 0.1457 ± 9.67*10 <sup>-3</sup> |
| HC_200_3_13%            | n.d.                           | 0.0074 ± 5.65*10 <sup>-3</sup> | 0.2698 ± 8.54*10 <sup>-4</sup> | 0.0172 ± 2.06*10 <sup>-2</sup> | n.d.                           | 0.1528 ± 1.33*10 <sup>-3</sup> |
| HC_240_1_13%            | n.d.                           | n.d.                           | 0.3228 ± 1.17*10 <sup>-3</sup> | 0.0083 ± 2.61*10 <sup>-3</sup> | n.d.                           | 0.1585 ± 6.53*10 <sup>-5</sup> |
| HC_240_5_6%             | n.d.                           | n.d.                           | 0.3965 ± 1.41*10 <sup>-3</sup> | 0.0188 ± 2.94*10 <sup>-3</sup> | n.d.                           | 0.1854 ± 6.40*10 <sup>-4</sup> |
| <i>From Random runs</i> |                                |                                |                                |                                |                                |                                |
| R_230_3_20%             | n.d.                           | 0.0245 ± 7.80*10 <sup>-4</sup> | 0.0978 ± 5.48*10 <sup>-4</sup> | 0.0072 ± 5.75*10 <sup>-4</sup> | n.d.                           | 0.0329 ± 1.43*10 <sup>-4</sup> |
| R_250_3_20%             | n.d.                           | 0.0621 ± 3.44*10 <sup>-3</sup> | 0.1406 ± 8.16*10 <sup>-4</sup> | 0.0322 ± 1.13*10 <sup>-3</sup> | n.d.                           | 0.0518 ± 1.10*10 <sup>-3</sup> |
| R_200_3_20%             | n.d.                           | n.d.                           | n.d.                           | n.d.                           | n.d.                           | n.d.                           |
| R_220_3_20%             | n.d.                           | n.d.                           | 0.0921 ± 2.27*10 <sup>-3</sup> | 0.0132 ± 1.67*10 <sup>-5</sup> | 0.0007 ± 8.10*10 <sup>-4</sup> | 0.0080 ± 3.69*10 <sup>-3</sup> |
| R_230_3_20%             | 0.0001 ± 3.19*10 <sup>-6</sup> | 0.0036 ± 2.12*10 <sup>-5</sup> | 0.0988 ± 7.92*10 <sup>-4</sup> | 0.0031 ± 5.96*10 <sup>-6</sup> | n.d.                           | 0.0482 ± 3.32*10 <sup>-3</sup> |

<sup>1</sup> detection limit of the analytical method for concentration of those elements in µg/L: Cd < 0.008; Cr < 0.02; Cu < 0.08; Ni < 0.04; Pb < 0.2; Zn < 0.01; <sup>2</sup> n.d. = not detected.

**Table S5.** Production of aromatic compounds in hydrochars (HC) and process water (PW) during HTC conversion using SCG.

| SCG and its HC | HMF<br>[mg/kg TS] | Furfural<br>[mg/kg TS] | Phenol<br>[mg/kg TS] | Cresol<br>[mg/kg TS] | Catechol<br>[mg/kg TS] | Guaiacol<br>[mg/kg TS] |
|----------------|-------------------|------------------------|----------------------|----------------------|------------------------|------------------------|
| SCG            | n.d.              | 243.47                 | n.d.                 | n.d.                 | n.d.                   | n.d.                   |
| HC_160_5_13%   | 4181.36           | n.d.                   | n.d.                 | n.d.                 | 1448.82                | n.d.                   |
| HC_240_1_13%   | 133.78            | 916.92                 | 2061.83              | n.d.                 | 1730.22                | 1114.95                |
| HC_200_3_13%   | 1689.17           | n.d.                   | 915.52               | n.d.                 | 1009.02                | 380.35                 |
| HC_240_5_6%    | n.d.              | n.d.                   | 3690.81              | 1032.01              | 1207.37                | 1007.04                |
| HC_160_5_6%    | 2474.52           | 2193.23                | n.d.                 | n.d.                 | 1246.70                | 1092.62                |
| HC_160_1_6%    | 409.31            | n.d.                   | n.d.                 | n.d.                 | n.d.                   | n.d.                   |
| PW             | HMF<br>[mg/L]     | Furfural<br>[mg/L]     | Phenol<br>[mg/L]     | Cresol<br>[mg/L]     | Catechol<br>[mg/L]     | Guaiacol<br>[mg/L]     |
| PW_160_5_13%   | 938.68            | 243.28                 | n.d.                 | n.d.                 | n.d.                   | n.d.                   |
| PW_240_1_13%   | 15.70             | n.d.                   | 241.66               | n.d.                 | 213.81                 | n.d.                   |
| PW_200_3_13%   | 376.26            | 49.14                  | 101.87               | n.d.                 | 149.65                 | n.d.                   |
| PW_240_5_6%    | n.d.              | n.d.                   | 286.80               | n.d.                 | 163.33                 | n.d.                   |
| PW_160_5_6%    | 489.54            | 253.55                 | n.d.                 | n.d.                 | n.d.                   | n.d.                   |
| PW_160_1_6%    | 80.24             | 94.70                  | n.d.                 | n.d.                 | n.d.                   | n.d.                   |

<sup>1</sup> detection limit (mg/kg or mg/l) of the analytical instrument: HMF < 0.004; Furfural < 0.0124; Phenol < 0.079; Cresol < 0.058; Catechol < 0.027; Guaiacol < 0.008; <sup>2</sup> n.d. = not detected.

**Table S6.** Model and parameters from Borrero-López et al. (2018) were used in this study to predict the production of phenolic compounds from the HTC of SCG feedstock.

| Aromatics Compounds | $\delta$  | B        | $\kappa$ |
|---------------------|-----------|----------|----------|
| Guaiacol            | 0.014     | 2.87E-05 | 1.35     |
| Phenol              | -6.17E-04 | 2.27E-06 | 1.61     |
| Cresol              | 1.65E-03  | 1.63E-13 | 3.58     |

$$C_{\text{phenolic compound}} = \delta + B \cdot e^{(\kappa(\log R_0))} \quad (S1)$$

**Table S7.** Change in aromatic compounds of unwashed hydrochars (HC), washed hydrochars (wHC) from 6 DoE set-up runs.

| HC and wHC     | HMF<br>[mg/kg TS] | Furfural<br>[mg/kg TS] | Phenol<br>[mg/kg TS] | Cresol<br>[mg/kg TS] | Catechol<br>[mg/kg TS] | Guaiacol<br>[mg/kg TS] |
|----------------|-------------------|------------------------|----------------------|----------------------|------------------------|------------------------|
| HC_160_1_6%    | 409.31            | n.d.                   | n.d.                 | n.d.                 | n.d.                   | n.d.                   |
| wHC1_160_1_6%  | n.d.              | n.d.                   | n.d.                 | n.d.                 | n.d.                   | n.d.                   |
| wHC2_160_1_6%  | n.d.              | n.d.                   | n.d.                 | n.d.                 | n.d.                   | n.d.                   |
| HC_160_5_6%    | 2474.52           | 2193.23                | n.d.                 | n.d.                 | 1246.70                | 1092.62                |
| wHC1_160_5_6%  | 604.25            | 1225.67                | n.d.                 | n.d.                 | n.d.                   | n.d.                   |
| wHC2_160_5_6%  | 233.73            | 1208.85                | n.d.                 | n.d.                 | n.d.                   | n.d.                   |
| HC_160_5_13%   | 4181.36           | n.d.                   | 539.55               | n.d.                 | 1448.82                | n.d.                   |
| wHC1_160_5_13% | 1489.44           | n.d.                   | 579.71               | n.d.                 | 1139.96                | n.d.                   |
| wHC2_160_5_13% | 574.97            | n.d.                   | n.d.                 | n.d.                 | 1017.03                | n.d.                   |
| HC_200_3_13%   | 1689.17           | n.d.                   | 915.51               | n.d.                 | 1009.02                | 380.35                 |
| wHC1_200_3_13% | 705.65            | n.d.                   | 932.11               | n.d.                 | 962.10                 | 380.42                 |
| wHC2_200_3_13% | 392.28            | n.d.                   | 826.07               | n.d.                 | 962.27                 | 334.36                 |
| HC_240_1_13%   | 133.78            | 916.92                 | 2061.83              | n.d.                 | 1730.22                | 1114.95                |
| wHC1_240_1_13% | 115.48            | 1006.06                | 2464.96              | n.d.                 | 1092.44                | 1195.98                |
| wHC2_240_1_13% | n.d.              | n.d.                   | 2425.52              | 1254.18              | 948.29                 | 1147.40                |
| HC_240_5_6%    | n.d.              | n.d.                   | 3690.81              | 1032.01              | 1207.37                | 1007.04                |
| wHC1_240_5_6%  | n.d.              | n.d.                   | 2589.05              | 968.17               | 782.86                 | 906.95                 |
| wHC2_240_5_6%  | n.d.              | n.d.                   | 2484.17              | 1082.70              | n.d.                   | 1002.36                |
| PW and WW      | HMF<br>[mg/L]     | Furfural<br>[mg/L]     | Phenol<br>[mg/L]     | Cresol<br>[mg/L]     | Catechol<br>[mg/L]     | Guaiacol<br>[mg/L]     |
| PW_160_1_6%    | 80.24             | 94.70                  | n.d.                 | n.d.                 | n.d.                   | n.d.                   |
| WW1_160_1_6%   | 74.87             | 32.37                  | n.d.                 | n.d.                 | n.d.                   | n.d.                   |
| WW2_160_1_6%   | n.d.              | n.d.                   | n.d.                 | 31.47                | n.d.                   | n.d.                   |



|               |        |        |        |       |        |      |
|---------------|--------|--------|--------|-------|--------|------|
| PW_160_5_6%   | 489.54 | 253.55 | n.d.   | n.d.  | n.d.   | n.d. |
| WW1_160_5_6%  | 96.01  | 34.21  | n.d.   | n.d.  | n.d.   | n.d. |
| WW2_160_5_6%  | 12.58  | n.d.   | n.d.   | n.d.  | n.d.   | n.d. |
| PW_160_5_13%  | 938.68 | 243.28 | n.d.   | n.d.  | n.d.   | n.d. |
| WW1_160_5_13% | 306.27 | 101.24 | n.d.   | n.d.  | n.d.   | n.d. |
| WW2_160_5_13% | 88.75  | n.d.   | n.d.   | n.d.  | n.d.   | n.d. |
| PW_200_3_13%  | 376.26 | 49.14  | 101.87 | n.d.  | 149.65 | n.d. |
| WW1_200_3_13% | 115.02 | 32.14  | 61.65  | n.d.  | 93.54  | n.d. |
| WW2_200_3_13% | 40.88  | 27.72  | 45.50  | n.d.  | 74.16  | n.d. |
| PW_240_1_13%  | 15.70  | n.d.   | 241.66 | n.d.  | 213.81 | n.d. |
| WW1_240_1_13% | 13.34  | n.d.   | 116.64 | n.d.  | 97.85  | n.d. |
| WW2_240_1_13% | 12.47  | n.d.   | 68.67  | 32.57 | 69.32  | n.d. |
| PW_240_5_6%   | 376.26 | 49.14  | 101.87 | n.d.  | 149.65 | n.d. |
| WW1_240_5_6%  | 115.02 | 32.14  | 61.65  | n.d.  | 93.54  | n.d. |
| WW2_240_5_6%  | 40.88  | 27.72  | 45.50  | n.d.  | 74.16  | n.d. |

<sup>1</sup> detection limit (mg/kg or mg/l) of the analytical method: HMF < 0.004; Furfural < 0.0124; Phenol < 0.079; Cresol < 0.058; Catechol < 0.027; Guaiacol < 0.008; <sup>2</sup> n.d. = not detected.

**Table S8.** Elemental analysis, ash and HHV of unwashed hydrochars (HC) and washed hydrochars (wHC) from 6 DoE set-up runs.

| HC and wHC     | C<br>[wt%-db] | H<br>[wt%-db] | N<br>[wt%-db] | S<br>[wt%-db] | O<br>[wt%-db] | Ash<br>[wt%-db] | HHV<br>[MJ/kg] |
|----------------|---------------|---------------|---------------|---------------|---------------|-----------------|----------------|
| HC_160_1_6%    | 57.98 ± 0.184 | 5.70 ± 0.078  | 2.19 ± 0.031  | 0.34 ± 0.019  | 33.78 ± 0.382 | 0.30 ± 0.006    | 24.35 ± 0.039  |
| wHC1_160_1_6%  | 58.30 ± 0.113 | 5.86 ± 0.013  | 2.00 ± 0.025  | 0.30 ± 0.019  | 33.54 ± 0.171 | 0.30 ± 0.011    | 24.63 ± 0.021  |
| wHC2_160_1_6%  | 58.63 ± 0.163 | 5.80 ± 0.057  | 1.99 ± 0.016  | 0.28 ± 0.005  | 33.30 ± 0.163 | 0.29 ± 0.015    | 24.49 ± 0.077  |
| HC_160_5_6%    | 59.88 ± 0.049 | 5.89 ± 0.174  | 2.16 ± 0.129  | 0.23 ± 0.010  | 31.84 ± 0.623 | 0.22 ± 0.002    | 25.22 ± 0.047  |
| wHC1_160_5_6%  | 60.44 ± 0.085 | 6.21 ± 0.108  | 2.01 ± 0.001  | 0.22 ± 0.009  | 31.12 ± 0.013 | 0.22 ± 0.002    | 25.77 ± 0.017  |
| wHC2_160_5_6%  | 60.73 ± 0.028 | 6.28 ± 0.191  | 2.02 ± 0.031  | 0.21 ± 0.008  | 30.76 ± 0.242 | 0.22 ± 0.002    | 25.76 ± 0.120  |
| HC_160_5_13%   | 58.54 ± 0.007 | 5.56 ± 0.133  | 2.38 ± 0.259  | 0.29 ± 0.006  | 33.24 ± 2.249 | 0.30 ± 0.019    | 25.47 ± 0.068  |
| wHC1_160_5_13% | 60.58 ± 0.049 | 5.76 ± 0.062  | 2.14 ± 0.045  | 0.28 ± 0.014  | 31.24 ± 0.173 | 0.29 ± 0.003    | 25.96 ± 0.089  |
| wHC2_160_5_13% | 61.08 ± 0.035 | 5.84 ± 0.074  | 2.01 ± 0.026  | 0.26 ± 0.007  | 30.81 ± 0.131 | 0.29 ± 0.001    | 25.71 ± 0.062  |
| HC_200_3_13%   | 69.09 ± 0.087 | 5.62 ± 0.030  | 2.85 ± 0.020  | 0.26 ± 0.005  | 22.18 ± 0.323 | 0.29 ± 0.009    | 29.11 ± 0.060  |
| wHC1_200_3_13% | 70.19 ± 0.028 | 5.47 ± 0.059  | 2.75 ± 0.017  | 0.27 ± 0.010  | 21.31 ± 0.349 | 0.30 ± 0.007    | 29.64 ± 0.024  |
| wHC2_200_3_13% | 70.52 ± 0.057 | 5.41 ± 0.101  | 2.70 ± 0.017  | 0.27 ± 0.009  | 21.10 ± 0.122 | 0.30 ± 0.002    | 29.70 ± 0.125  |
| HC_240_1_13%   | 73.34 ± 0.166 | 5.55 ± 0.106  | 3.06 ± 0.035  | 0.27 ± 0.007  | 17.78 ± 0.088 | 0.29 ± 0.010    | 31.11 ± 0.050  |
| wHC1_240_1_13% | 74.37 ± 0.096 | 5.79 ± 0.116  | 3.01 ± 0.016  | 0.27 ± 0.013  | 16.55 ± 0.044 | 0.29 ± 0.002    | 31.66 ± 0.065  |
| wHC2_240_1_13% | 74.79 ± 0.046 | 5.60 ± 0.187  | 2.94 ± 0.037  | 0.27 ± 0.012  | 16.39 ± 0.217 | 0.30 ± 0.008    | 31.78 ± 0.031  |
| HC_240_5_6%    | 77.42 ± 0.076 | 6.13 ± 0.005  | 3.10 ± 0.018  | 0.26 ± 0.010  | 13.09 ± 0.229 | 0.21 ± 0.004    | 32.97 ± 0.057  |
| wHC1_240_5_6%  | 78.11 ± 0.028 | 6.57 ± 0.191  | 3.25 ± 0.021  | 0.27 ± 0.018  | 12.50 ± 0.178 | 0.29 ± 0.003    | 33.30 ± 0.063  |
| wHC2_240_5_6%  | 78.15 ± 0.067 | 6.02 ± 0.127  | 3.02 ± 0.025  | 0.26 ± 0.012  | 12.55 ± 0.307 | 0.28 ± 0.002    | 33.36 ± 0.027  |

**Table S9.** Cumulative distribution Q<sub>3</sub> of final spherical pellets from both SCG and its hydrochars after the agglomeration.

| <b>Q3</b><br><b>[wt%-db]</b> | <b>Exp. 1</b><br><b>(SCG_M)</b> | <b>Exp. 2</b><br><b>(SCG_gSM)</b> | <b>Exp. 3</b><br><b>(SCG_HM)</b> | <b>Exp. 4</b><br><b>(wHC160_M)</b> | <b>Exp. 5</b><br><b>(wHC200_St)</b> | <b>Exp. 6</b><br><b>(Mix_HC 200_St)</b> | <b>Exp. 7</b><br><b>(wHC240_HM)</b> |
|------------------------------|---------------------------------|-----------------------------------|----------------------------------|------------------------------------|-------------------------------------|-----------------------------------------|-------------------------------------|
| 0 [μm]                       | 0.03 ± 0.00                     | n.d.                              | 0.00 ± 0.00                      | 0.02 ± 0.01                        | 4.48 ± 0.45                         | 18.23 ± 0.04                            | 0.07 ± 0.02                         |
| 100 [μm]                     | 0.08 ± 0.02                     | 0.29 ± 0.01                       | 0.00 ± 0.00                      | 0.15 ± 0.03                        | 0.00 ± 0.00                         | 0.00 ± 0.00                             | 0.18 ± 0.01                         |
| 200 [μm]                     | 1.71 ± 0.63                     | 1.11 ± 0.40                       | 2.58 ± 0.22                      | 0.59 ± 0.00                        | 0.00 ± 0.00                         | 0.00 ± 0.00                             | 0.45 ± 0.02                         |
| 400 [μm]                     | 3.32 ± 1.07                     | 2.03 ± 0.78                       | 4.79 ± 0.33                      | 0.92 ± 0.01                        | 0.00 ± 0.00                         | 0.00 ± 0.00                             | 0.55 ± 0.03                         |
| 500 [μm]                     | 19.11 ± 2.13                    | 17.55 ± 4.69                      | 38.79 ± 1.04                     | 2.92 ± 0.19                        | 0.00 ± 0.00                         | 0.00 ± 0.00                             | 1.24 ± 0.05                         |
| 1000 [μm]                    | 74.17 ± 0.44                    | 67.52 ± 3.74                      | 94.45 ± 0.18                     | 21.48 ± 0.13                       | 7.78 ± 0.23                         | 61.08 ± 0.15                            | 3.37 ± 0.06                         |
| 2000 [μm]                    | 99.66 ± 0.43                    | 96.45 ± 1.13                      | 100.00 ± 0.00                    | 77.83 ± 0.55                       | 27.03 ± 0.36                        | 96.22 ± 0.21                            | 15.96 ± 0.76                        |
| 4000 [μm]                    | 100.00 ± 0.00                   | 100.00 ± 0.00                     | 100.00 ± 0.00                    | 100.00 ± 0.00                      | 100.00 ± 0.00                       | 100.00 ± 0.00                           | 100.00 ± 0.00                       |

\* n.d. = not detected.

**Table S10.** Results of bulk density and mechanical stability agglomerated spherical pellets.

| <b>Pellets</b><br><b>(Spherical and Cylindrical)</b> | <b>Bulk Density</b><br><b>[kg/m<sup>3</sup>]</b> | <b>Mechanical Stability</b><br><b>[wt%-db]</b> |
|------------------------------------------------------|--------------------------------------------------|------------------------------------------------|
| sp_SCG_gSM                                           | 335.81 ± 2.29                                    | 98.04 ± 0.00                                   |
| sp_wHC160_M                                          | 262.50 ± 1.91                                    | 98.18 ± 0.20                                   |
| sp_Mix_HC 200_St                                     | 341.27 ± 1.00                                    | 76.59 ± 1.49                                   |
| sp_wHC240_HM                                         | 300.55 ± 0.45                                    | 96.49 ± 0.62                                   |
| cp_SCG                                               | 675.43 ± 2.91                                    | 77.76 ± 0.94                                   |
| cp_HC_220                                            | 490.89 ± 1.96                                    | 92.11 ± 0.16                                   |
| cp_wHC_220                                           | 502.20 ± 2.10                                    | 94.00 ± 0.22                                   |
| cp_Wood                                              | 659.72 ± 2.03                                    | 99.45 ± 0.05                                   |
| DIN EN ISO 17225-8:2023                              | ≥ 600                                            | ≥ 96.00                                        |

<sup>1</sup> sp = spherical pellets; <sup>2</sup> cp= cylindrical pellets with size of 8x10 mm (Diameter x Length) without additives; <sup>3</sup> DIN EN ISO 17225-8 :2023 = standard for cylindrical pellets from thermally treated non-woody biomass.
